# Supplementary material
Source: PubMed Central journal article supplement (PMC6689404)

## Supplementary Online Content

Napolitano LM, Angus DC, Uyeki TM. Critically ill patients with influenza A(H1N1)pdm09 virus infection in 2014. *JAMA*. doi:10.1001/jama.2014.2116.

**eFigure.** Chest Radiographs, CT Scans, and Autopsy Lung Specimens of Confirmed Influenza A(H1N1)pdm09 Virus Infection

This supplementary material has been provided by the authors to give readers additional information about their work.

**eFigure. Chest Radiographs, CT Scans, and Autopsy Lung Specimens of Confirmed Influenza A(H1N1)pdm09 Virus Infection**

- A.** Chest radiographs of patients with confirmed H1N1pdm09-associated bilateral pneumonia and ARDS
- B.** CT scan imaging of confirmed H1N1pdm09-associated bilateral viral pneumonitis demonstrating bilateral peribronchovascular consolidation due to multifocal pneumonia and ARDS
- C.** Autopsy lung gross pathology confirming H1N1pdm09-associated hemorrhagic pneumonitis, diffuse alveolar damage, and multiple peripheral primary pulmonary thrombi (arrows).

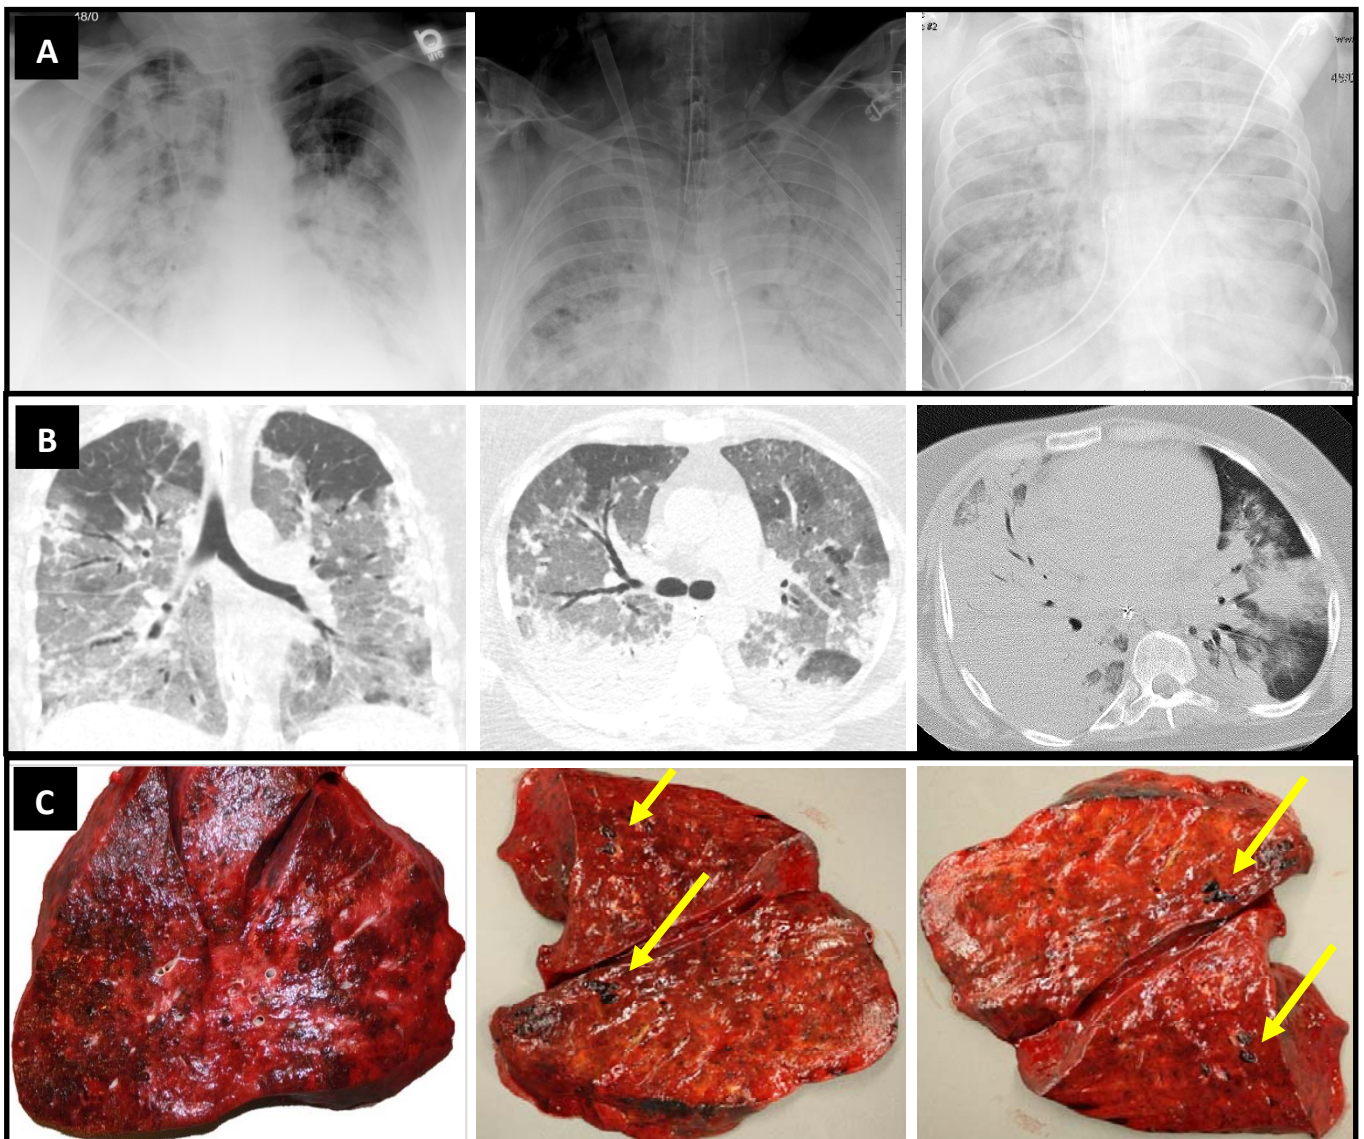

Supplement: NIHMS1040574-supplement-Supplemental.pdf [file NIHMS1040574-supplement-Supplemental.pdf]
